# Supplementary material for: Molecular dipole interfacial engineering for high-performance quantum-dot light-emitting diodes
Source: Royal Society of Chemistry journal article supplement (doi:10.1039/d4tc04183f), 2024-11-19
Supplement: d4tc04183f1.pdf [file d4tc04183f1.pdf]

## Support Information

### Molecular dipole interfacial engineering for high-performance quantum-dot light-emitting diodes

Kuibao Yu<sup>1</sup>, Hailong Hu<sup>1,2,\*</sup>, Yuanhang Li<sup>3</sup>, Wenjuan Huang<sup>3</sup>, Yuan Qie<sup>1</sup>, Chao

Zhong<sup>1</sup>, Tao Chen<sup>1</sup>, Renjie Li<sup>1</sup>, Tailiang Guo<sup>1,2</sup>, Fushan Li<sup>1,2,\*</sup>

<sup>1</sup>Institute of Optoelectronic Technology, Fuzhou University, Fuzhou 350116,

P. R. China

<sup>2</sup>Fujian Science and Technology Innovation Laboratory for Optoelectronic,

Information of China, Fuzhou 350108, P. R. China

<sup>3</sup>Huaying Technology (Group) Co., Ltd, Fuzhou 350015, P. R. China

E-mail addresses: huhl@fzu.edu.cn (H. Hu); fsli@fzu.edu.cn (F. Li)

**Keywords:** Quantum dot light-emitting diodes; self-assembled monolayers; Dipole interlayer; Carrier injection; Molecular arrangement.

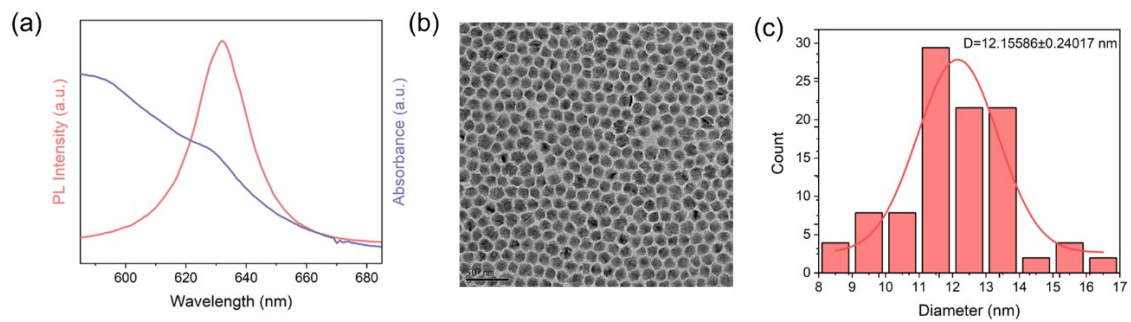

Figure S1 (a) PL and absorption spectra of red CdSe@CdS QDs. (b)TEM images and (c) particle diameter distribution of QDs.

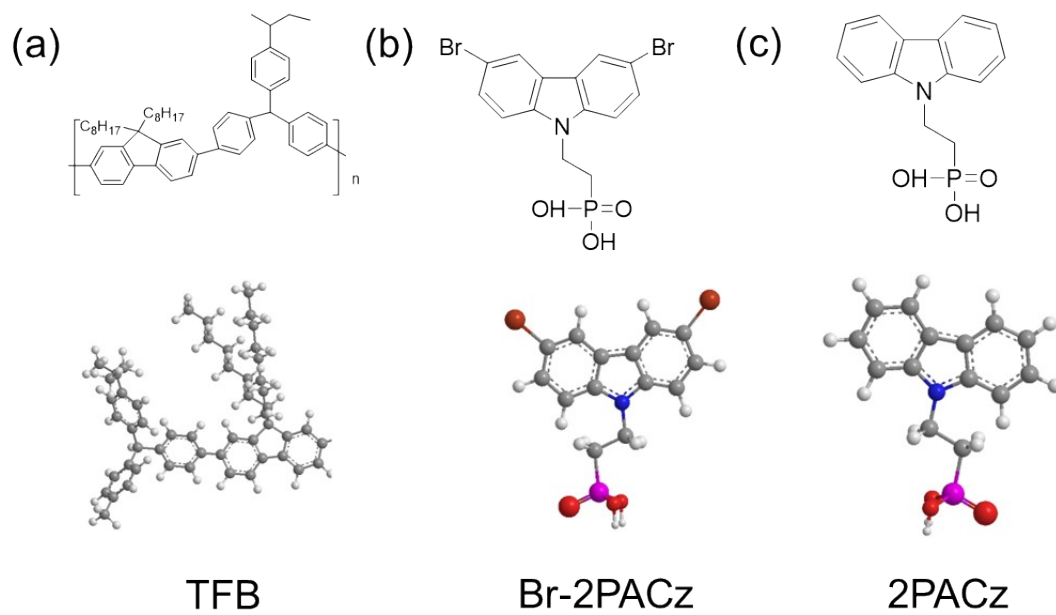

Figure S2 Chemical Structure and molecular model of (a) TFB, (b) Br-2PACz and (c) 2PACz.

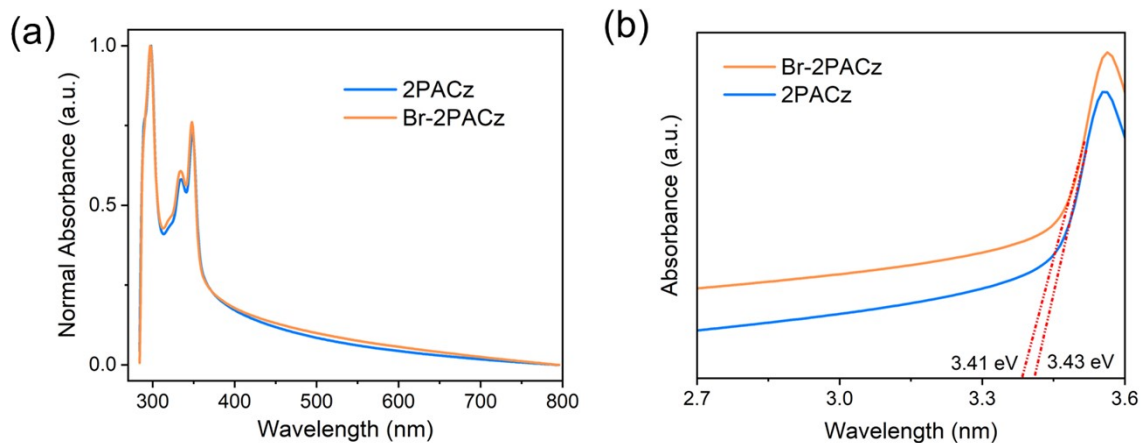

Figure S3 (a) Absorption spectra of the 2PACz and Br-2PACz films. (b) UPS results of 2PACz and Br-2PACz films.

Ultraviolet photoelectron spectroscopy (UPS) and optical bandgap were measured to calculate the highest occupied molecular orbitals (HOMO) level and the lowest unoccupied molecular orbital (LUMO) levels. The valence band region ( $E_{\text{onset}}$ ) and the secondary photoelectron cutoff ( $E_{\text{cutoff}}$ ) are obtained from the UPS results. The HOMO level is calculated by the following formula:  $\text{HOMO} = 21.22 - |E_{\text{cutoff}} - E_{\text{onset}}|$ . The LUMO is defined as the energy difference between the HOMO levels and the optical bandgap. Calculated material HOMO and LUMO by UPS data.

For Br-2PACz:

$$\begin{aligned} \text{VBM} &= 21.22 - |E_{\text{cutoff}} - E_{\text{onset}}| \\ &= 21.22 - 16.38 + 0.79 \\ &= 5.63 \text{ eV} \\ \text{CBM} &= 5.63 - 3.41 = 2.22 \text{ eV} \end{aligned}$$

For 2PACz:

$$\begin{aligned} \text{VBM} &= 21.22 - |E_{\text{cutoff}} - E_{\text{onset}}| \\ &= 21.22 - 17.02 + 1.15 \\ &= 5.35 \text{ eV} \end{aligned}$$

$$\text{CBM} = 5.35 - 3.43 = 1.92 \text{ eV}$$

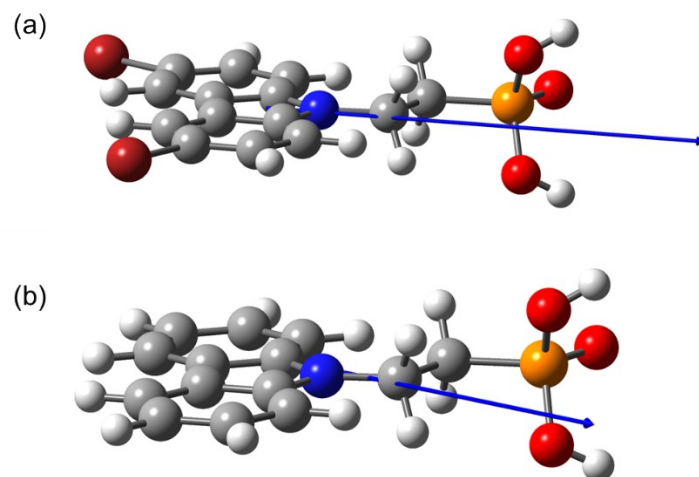

Figure S4 Br-2PACz and 2PACz dipole moment direction.

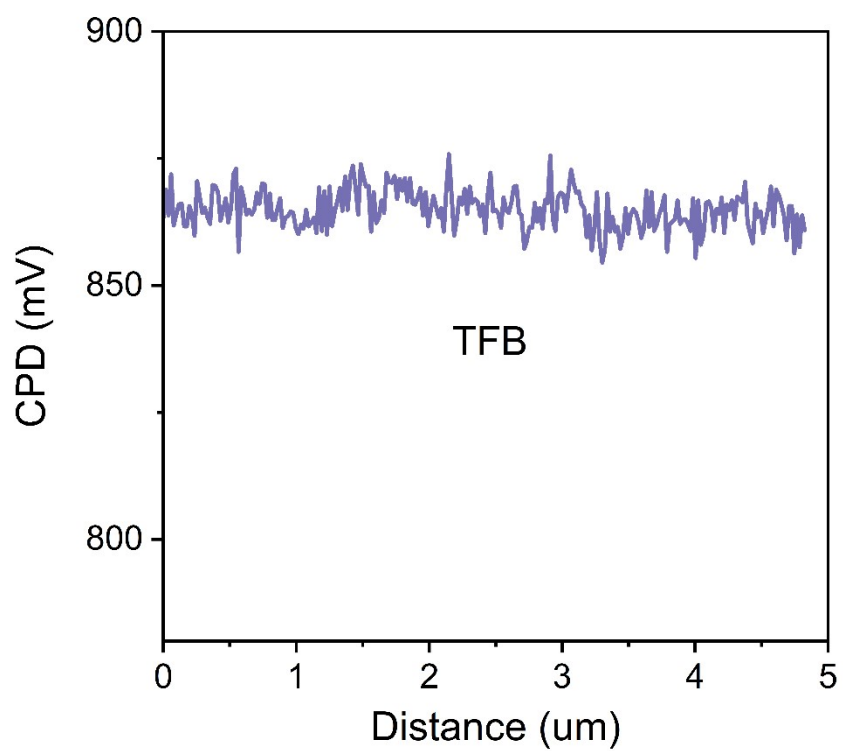

Figure S5 Contact potential differences (CPD) of TFB film

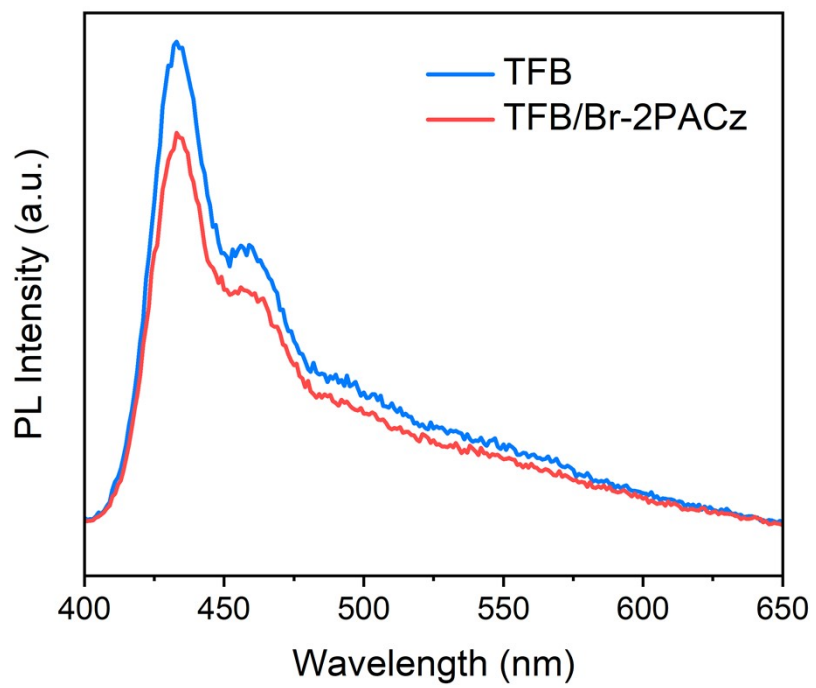

Figure S6 PL spectra of TFB and TFB/Br-2PACz films.



Table S1 Fitting results of PL decay curves.

| <i>sample</i> | $T_1(\text{ns})$ | $T_2(\text{ns})$ | $A_1$ | $A_2$ | $\chi^2$ | $\tau_{\text{avg}}(\text{ns})$ |
|---------------|------------------|------------------|-------|-------|----------|--------------------------------|
| TFB           | 7.94             | 18.71            | 2794  | 2421  | 1.153    | 15.17                          |
| TFB/Br-2PACz  | 8.80             | 23.18            | 2826  | 1671  | 1.155    | 17.56                          |

The PL decay curve can be fitted by the tri-exponential function:

$$\text{decay}(t) = \sum_{n=1}^2 A_n e^{-t/T_n}$$

where  $t$  is time,  $A_1$  and  $A_2$  are constants, and  $T_1$  and  $T_2$  represent the interaction between excitons and phonons, the decay lifetimes corresponding to the intrinsic exciton relaxation, and the interaction between excitons and defects, respectively. The average lifetime ( $T_{\text{ave}}$ ) can be calculated as:

$$T_{\text{ave}} = \frac{\sum_{n=1}^2 A_n T_n^2}{\sum_{n=1}^2 A_n T_n}$$

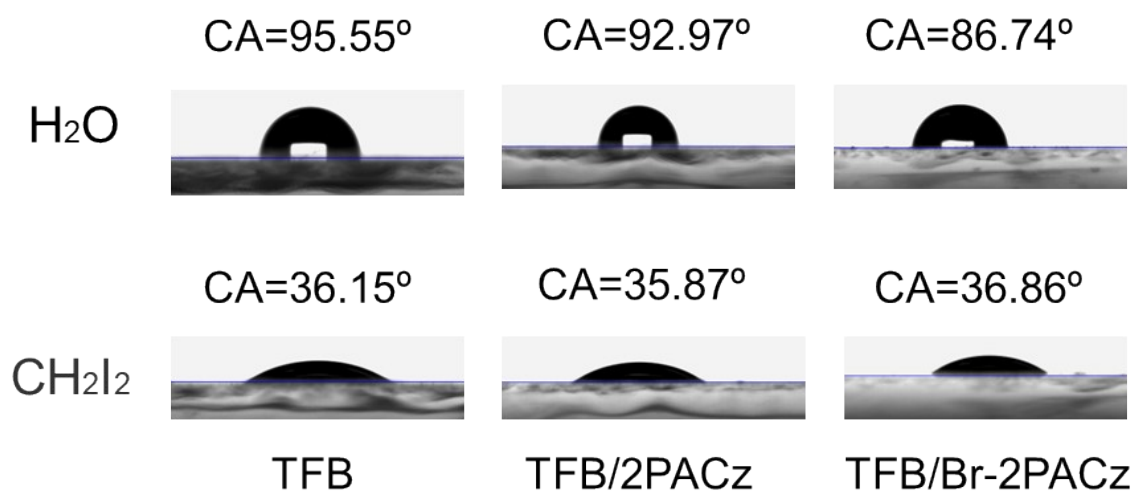

Figure S7 The contact angle of TFB, TFB/2PACz and TFB/Br-2PACz

The contact angle of the material is measured using water and diiodomethane as non-polar solvents. The following formula calculates the surface tension of different components:

Water: London dispersion ( $\gamma^d$ )=51, polar ( $\gamma^p$ )=21.8,  $\gamma_L=72.8$ .

Diiodomethane: London dispersion ( $\gamma^d$ )=0, polar ( $\gamma^p$ )=50.8,  $\gamma_L=50.8$ .

$$\gamma_{water}(1 + \cos\theta_{water}) = \frac{4\gamma_{water}^d\gamma^d}{\gamma_{water}^d + \gamma^d} + \frac{4\gamma_{water}^p\gamma^p}{\gamma_{water}^p + \gamma^p}$$

$$\gamma_{EG}(1 + \cos\theta_{EG}) = \frac{4\gamma_{Diiodomethane}^d\gamma^d}{\gamma_{Diiodomethane}^d + \gamma^d} + \frac{4\gamma_{Diiodomethane}^p\gamma^p}{\gamma_{Diiodomethane}^p + \gamma^p}$$

$$\gamma = \gamma^d + \gamma^p$$

Table S2 Detailed parameters of TFB, TFB/2PACz and TFB/Br-2PACz films

| Surface      | Contact angle<br>$\theta_{\text{H}_2\text{O}}$ [°] | Contact angle<br>$\theta_{\text{CH}_2\text{I}_2}$ [°] | $\gamma^{\text{d}}$<br>[mN m <sup>-1</sup> ] | $\gamma^{\text{p}}$<br>[mN m <sup>-1</sup> ] | Surface tension<br>[mN m <sup>-1</sup> ] |
|--------------|----------------------------------------------------|-------------------------------------------------------|----------------------------------------------|----------------------------------------------|------------------------------------------|
| TFB          | 95.55                                              | 36.15                                                 | 42.48                                        | 0.12                                         | 42.6                                     |
| TFB/2PACz    | 92.97                                              | 35.87                                                 | 41.89                                        | 0.36                                         | 42.25                                    |
| TFB/Br-2PACz | 86.74                                              | 36.86                                                 | 39.53                                        | 1.63                                         | 41.16                                    |

The values in the table are the average values calculated for 5 samples

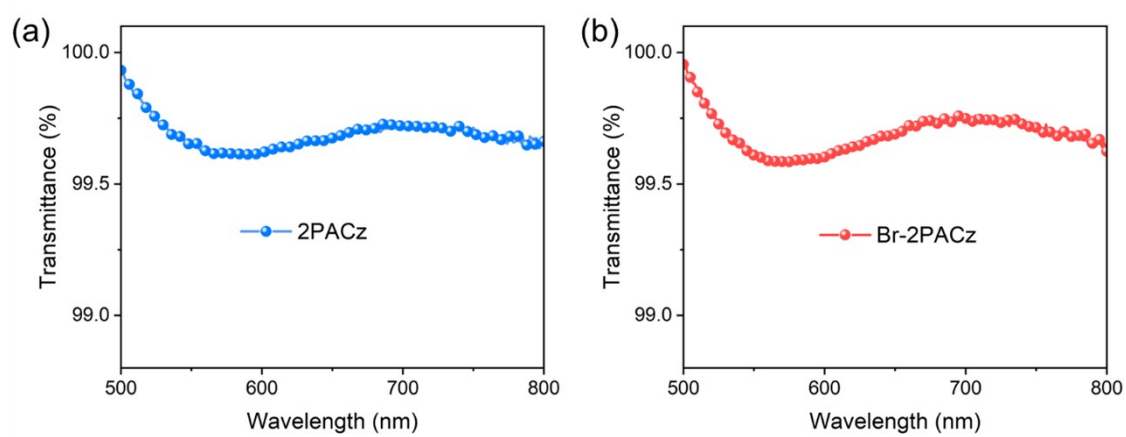

Figure S8 Transmittance spectra of (a) 2PACz and (b) Br-2PACz films.

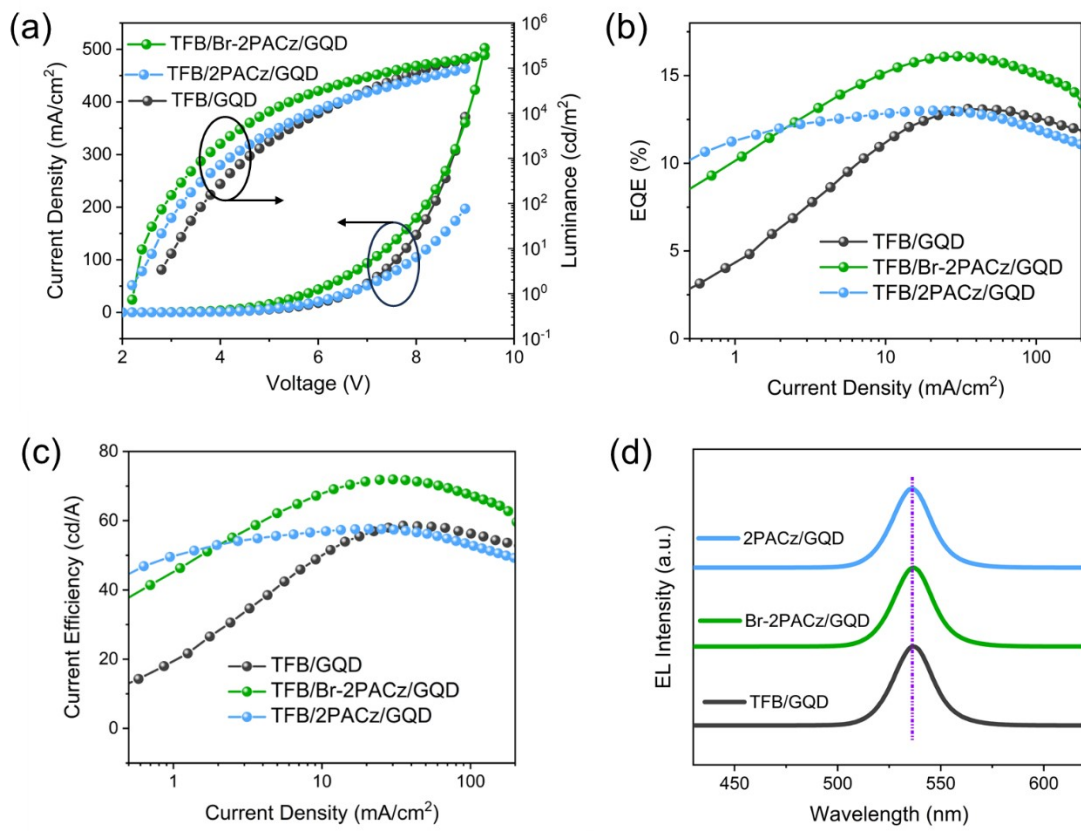

Figure S9 A series of device performance of (a-d) G-QLEDs.

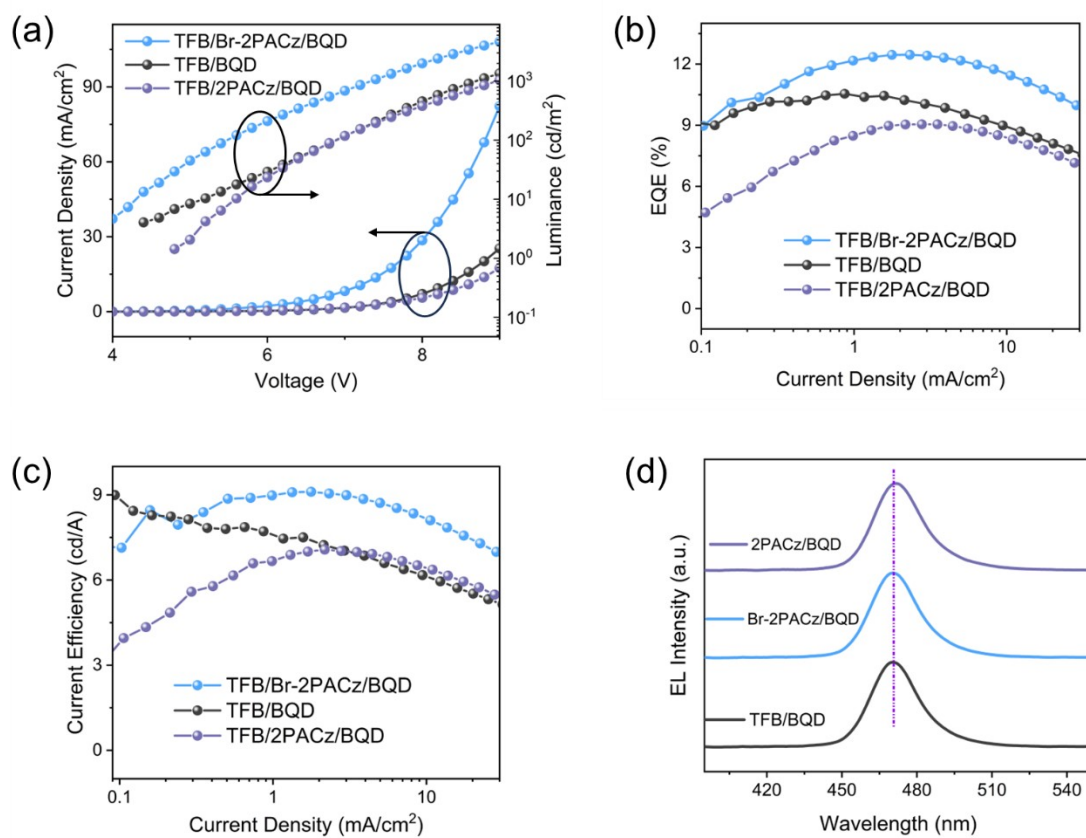

Figure S10 A series of device performance of (a-d) B-QLEDs.

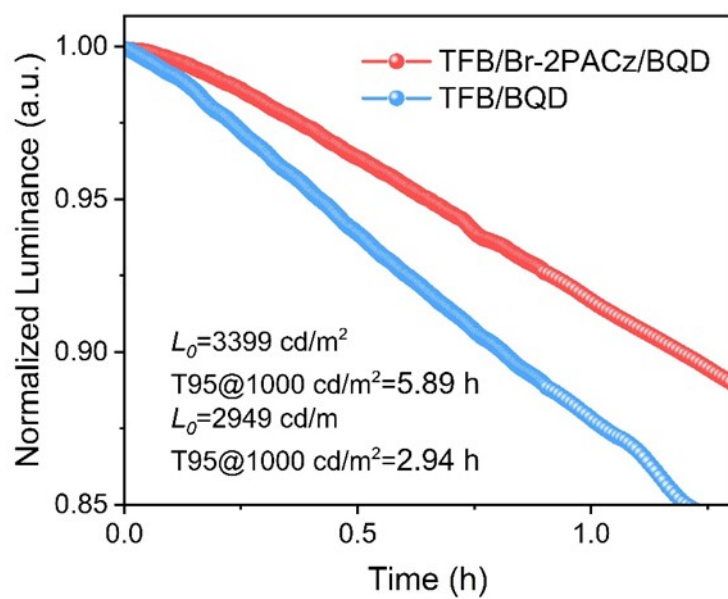

Figure S11 The lifetime of standard and optimized B-QLEDs.

Table S3 Relevant parameters of red/green/blue QLED

|               | HTL              | EQE<br>[%] | CE<br>[cd A <sup>-1</sup> ] | Lmax<br>[cd m <sup>-2</sup> ]<br>@7V | Turn-on<br>Voltage<br>[V] |
|---------------|------------------|------------|-----------------------------|--------------------------------------|---------------------------|
|               | TFB              | 20.58      | 20.60                       | 206001.50                            | 2                         |
| <b>R-QLED</b> | TFB/2PACz        | 20.52      | 18.29                       | 237424.73                            | 2                         |
|               | TFB/Br-<br>2PACz | 25.03      | 24.66                       | 274887.88                            | 1.8                       |
|               | TFB              | 13.1       | 58.55                       | 31823.658                            | 2.6                       |
| <b>G-QLED</b> | TFB/2PACz        | 13.0       | 57.64                       | 28724.99                             | 2.2                       |
|               | TFB/Br-<br>2PACz | 16.11      | 71.91                       | 63495.08                             | 2.2                       |
|               | TFB              | 10.55      | 7.86                        | 118.03                               | 4.0                       |
| <b>B-QLED</b> | TFB/2PACz        | 9.04       | 7.02                        | 118.06                               | 4.6                       |
|               | TFB/Br-<br>2PACz | 12.46      | 9.1                         | 687.68                               | 3.6                       |
